# Supplementary material for: Decreasing amyloid toxicity through an increased rate of aggregation
Source: Royal Society of Chemistry journal article supplement (doi:10.1039/c6cp06765d), 2016-11-30
Supplement: c6cp06765d1.pdf [file c6cp06765d1.pdf]

# Supplementary Information for: Decreasing amyloid toxicity through an increased rate of aggregation

Silvia Sonzini, Helen F. Stanyon, and Oren A. Scherman\*

*Melville Laboratory for Polymer Synthesis, Department of Chemistry, University of Cambridge, Lensfield Road, Cambridge, CB2 1EW, United Kingdom*

E-mail: oas23@cam.ac.uk

## Chemicals and Reagents

All amino acids used, hydroxybenzotriazole (HOBt), dichloromethane (DCM), dimethyl formamide (DMF) and 20% piperidine in DMF solution were bought from AGTC Bioproducts and used without further purification. NovaPEG Rink amide LL resin and  $\epsilon$ -aminohexanoic acid (Ahx) were purchased from Merck Novabiochem. Diisopropylcarbodiimide (DIC), diisopropylethyl-amine (DIPEA), trifluoroacetic acid (TFA), diethyl ether, thioanisole, ammonia iodide, thioflavin T (ThT), fluorescein isothiocyanate (FITC), monobasic potassium, dibasic sodium phosphate and phosphotungstic acid (PTA) were purchased from Sigma–Aldrich. HPLC–grade acetonitrile (ACN) and *N*-methylpyrrolidone (NMP), phenol, dimethylsulfide (DMS), ethanedithiol (EDT) and analytical grade purity 1,1,1,3,3,3-hexafluoroisopropanol (HFIP) were bought from Fisher Scientific. The buffer used for the photophysical characterizations was a sterile filtered 10 mM phosphate buffer (PB) adjusted to pH 7.4 prepared by dilution from a stock solution of 0.5 M phosphate buffer pH 7.4 in ultrapure water

(Synergy UV Ultrapure water system). CB[8] and CB[7] were synthesised following a published procedure<sup>1</sup> and their concentrations were standardized by calorimetric titration with methyl viologen (Sigma Aldrich). CB[8] concentration in the cell media was verified by UV-titration.<sup>2</sup>

## Thioflavin T Assay

The data from the ThT assay were fitted using an empirical equation previously reported:<sup>3</sup>

$$Y = (y_i + m_i x) + \frac{(y_f + m_f x)}{1 + e^{-(x-x_0)/\tau}} \quad (\text{S1})$$

where  $Y$  is the fluorescence intensity,  $x$  is the time,  $x_0$  is the time at half-height of fluorescence ( $t_{50}$ ), and  $\tau$  is a time constant. From this equation some empirical parameters can be obtained, such as the lag time ( $t_{lag} = x_0 - 2\tau$ ), the apparent fibre growth rate ( $k_{app} = 1/\tau$ ), and the  $t_{50}$ . The values we obtained are reported in S1.

Table S1: Values obtained for  $t_{lag}$  and  $k_{app}$  from fitting the ThT assay data to equation S1 for A $\beta$ 42 with 0, 3 or 6-fold excess CB[8].

| CB[8] equivalents            | 0    | 3    | 6    |
|------------------------------|------|------|------|
| $t_{lag}$ (h)                | 1.26 | 2.02 | 2.16 |
| $k_{app}$ (h <sup>-1</sup> ) | 1.26 | 2.41 | 2.94 |

# Cell Viability Assay

In order to establish the significance of the data obtained for the MTS assays on cells treated with A $\beta$ 42 and different concentrations of CB[8], we analyzed the results with the two-tailed paired t-test; the P-values obtained are reported in the following tables (S2 and S3).

Table S2:  $p$ -values from MTS assays on SH-SY5Y cells treated with media containing different concentrations of CB[8] and supplemented with freshly dissolved A $\beta$ 42.

| $p$ -value        | CB[8] 5 $\mu$ M       | CB[8] 10 $\mu$ M      | CB[8] 15 $\mu$ M      | CB[8] 20 $\mu$ M      |
|-------------------|-----------------------|-----------------------|-----------------------|-----------------------|
| . CB[8] 0 $\mu$ M | $2.99 \times 10^{-4}$ | $1.26 \times 10^{-7}$ | $4.06 \times 10^{-8}$ | $6.47 \times 10^{-8}$ |
| CB[8] 5 $\mu$ M   | —                     | 0.046                 | 0.072                 | 0.011                 |
| CB[8] 10 $\mu$ M  | —                     | —                     | 0.306                 | 0.411                 |
| CB[8] 15 $\mu$ M  | —                     | —                     | —                     | 0.844                 |

Table S3:  $p$ -values from MTS assays on SH-SY5Y cells treated with media supplemented with A $\beta$ 42 fibrils in the absence and in the presence of CB[8] (20  $\mu$ M) compared with freshly dissolved A $\beta$ 42.

| $p$ -value                         | A $\beta$ 42 fibrils - CB[8] 0 $\mu$ M | A $\beta$ 42 fibrils - CB[8] 20 $\mu$ M |
|------------------------------------|----------------------------------------|-----------------------------------------|
| A $\beta$ 42 fresh CB[8] 0 $\mu$ M | $1.58 \times 10^{-6}$                  | $1.20 \times 10^{-6}$                   |

## Additional Figures

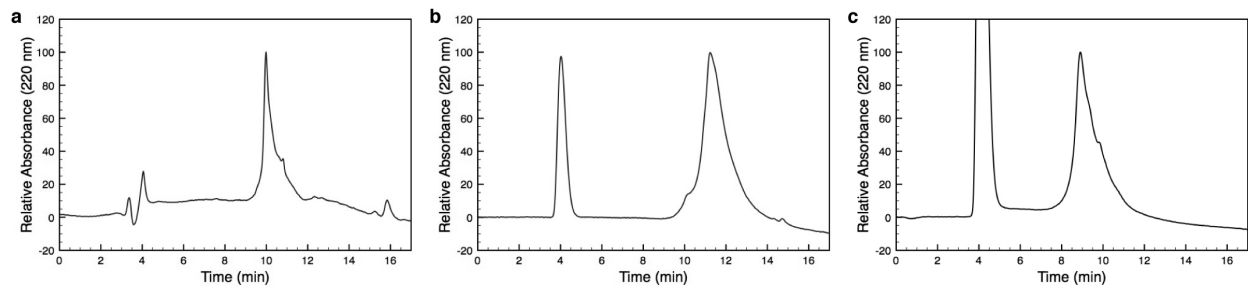

Figure S1: HPLC traces. a) HPLC trace of A $\beta$ 42, b) FITC-A $\beta$ 42 and c) A $\beta$ 42A<sub>4,19,20</sub>. All the traces are reported for the absorbance at 220 nm. In each figure the peak at 4 min represents the injection peak.

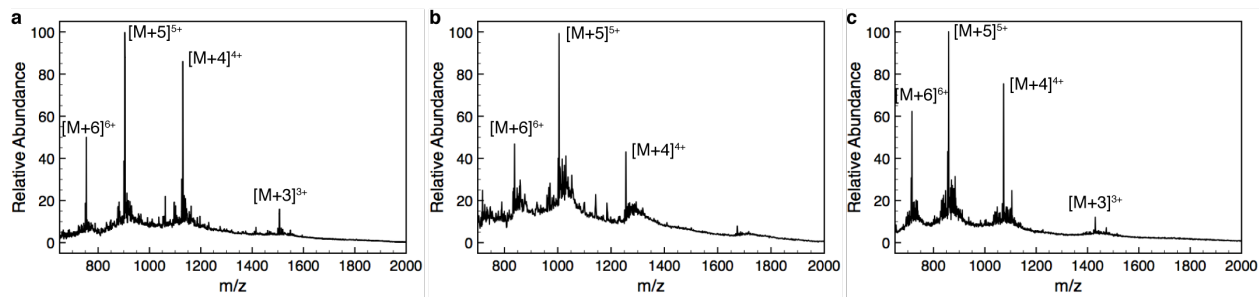

Figure S2: ESI analyses. a) A $\beta$ 42, MW: 753.84 (M+H)<sup>6+</sup>, 904.34 (M+H)<sup>5+</sup>, 1130.09 (M+H)<sup>4+</sup>, 1506.10 (M+H)<sup>3+</sup> (theor. MW: 4513); b) FITC-A $\beta$ 42, MW: 837.59 (M+H)<sup>6+</sup>, 1004.92 (M+H)<sup>5+</sup>, 1255.76 (M+H)<sup>4+</sup> (theor. MW: 5020); and c) A $\beta$ 42A<sub>4,19,20</sub>, MW: 715.76 (M+H)<sup>6+</sup>, 858.68 (M+H)<sup>5+</sup>, 1073.01 (M+H)<sup>4+</sup>, 1430.02 (M+H)<sup>3+</sup> (theor. MW: 4285).



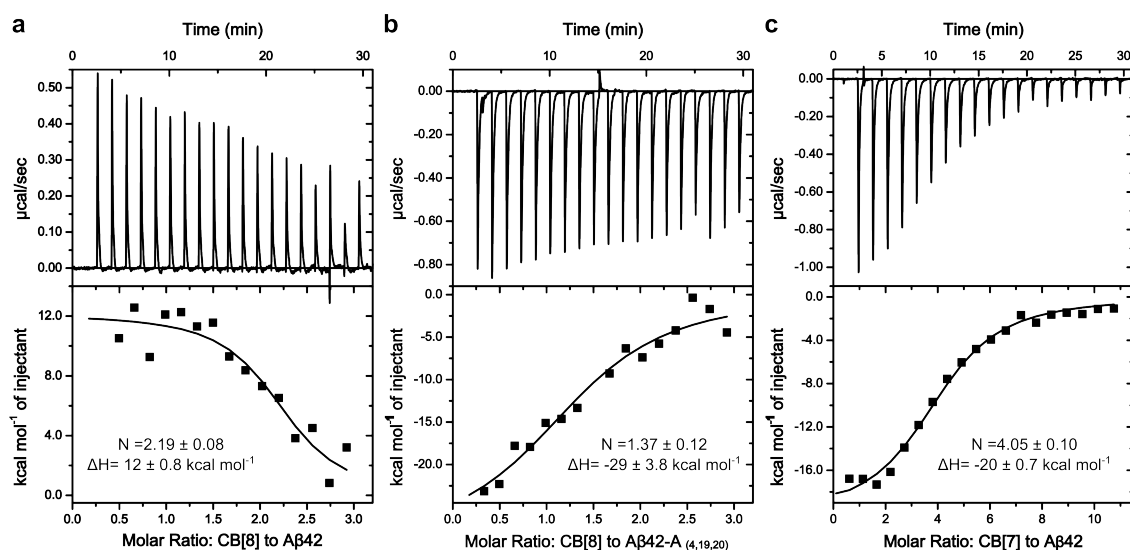

Figure S3: Binding analyses. a) ITC of CB[8] ( $80 \mu\text{M}$ ) titrated into A $\beta$ 42 solution ( $5 \mu\text{M}$ ) and b) A $\beta$ 42A<sub>4,19,20</sub> ( $5 \mu\text{M}$ ). c) ITC of CB[7] ( $280 \mu\text{M}$ ) titrated into A $\beta$ 42 solution ( $5 \mu\text{M}$ ). All the samples were dissolved in 10 mM PB pH 7.4 and immediately measured. Each experiment has been repeated at least three times.

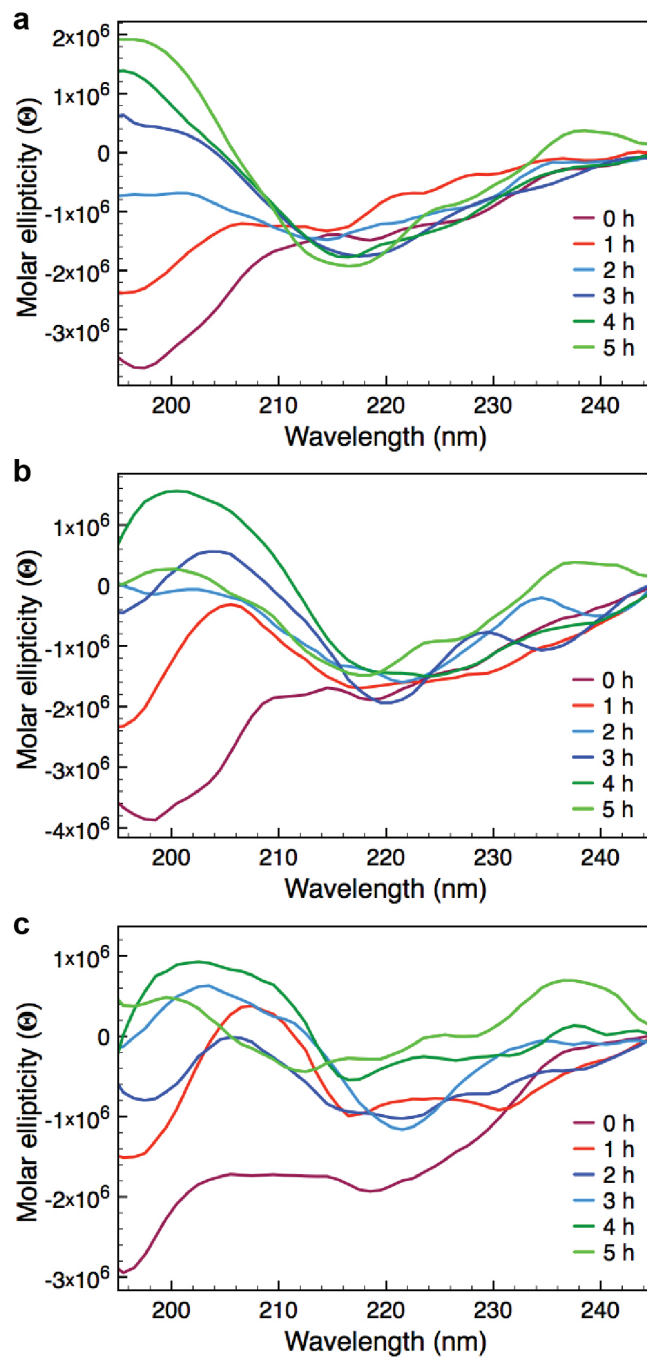

Figure S4: CD analyses over time. a-c) CD spectra of A $\beta$ 42 (7  $\mu$ M) with 0, 3 or 6-fold excess CB[8] respectively showing aggregation over time. All the CD spectra are represented as average of three independent samples. All the samples were dissolved in 10 mM PB pH 7.4 and directly measured for time 0 h. The samples were then kept at 37  $^{\circ}$ C and shaken at 200 rpm between each measurement

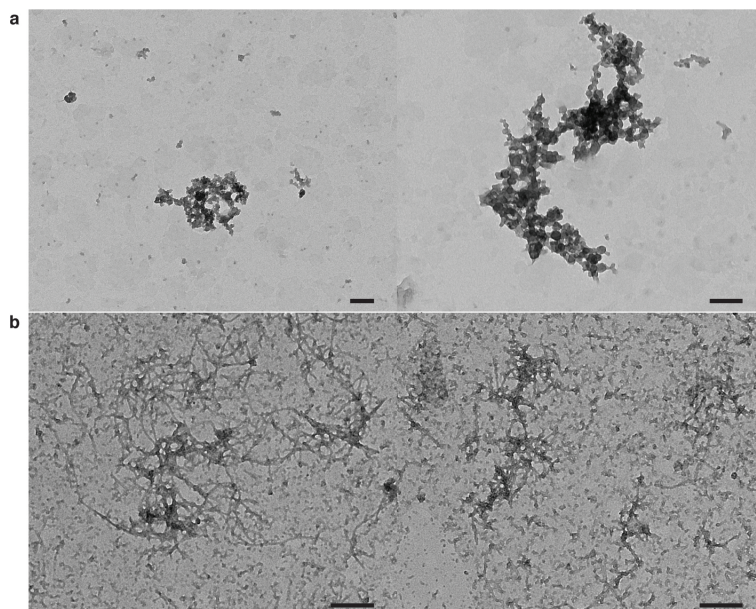

Figure S5: Additional TEM images. a) TEM images of CB[8] only. b) TEM images of A $\beta$ 42 (80  $\mu$ L of 7  $\mu$ M solution) seeded with a 10  $\mu$ L solution of A $\beta$ 42-CB[8] (7  $\mu$ M and 50  $\mu$ M, respectively) pre-incubated for 24 h at 37 °C and shaken at 250 rpm. The samples were then incubated for an additional 6 days before imaging. The samples were all dissolved in 10 mM PB pH 7.4. Scale bars represent 100 nm.

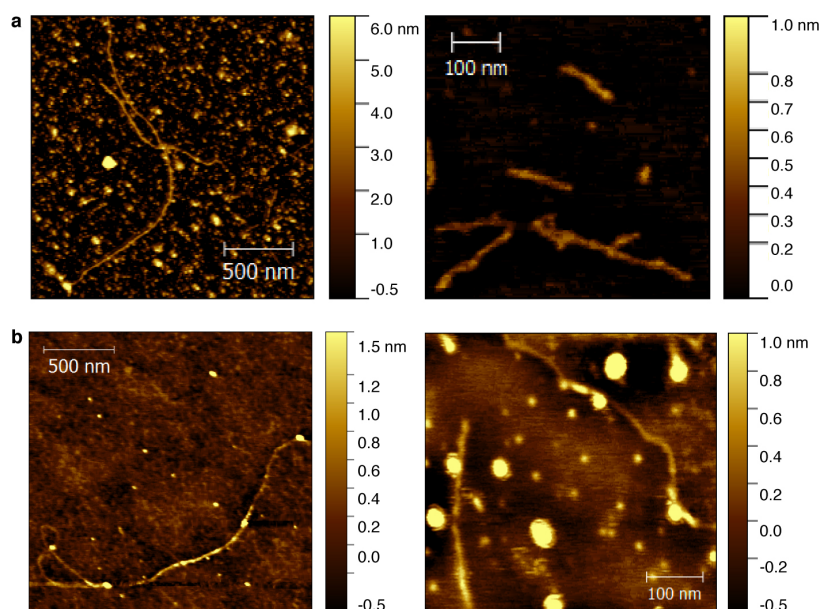

Figure S6: AFM topography images of A $\beta$ 42 with and without CB[8]. a) A $\beta$ 42 (10  $\mu$ M) and b) A $\beta$ 42-CB[8] (10  $\mu$ M and 50  $\mu$ M, respectively) samples. All samples were dissolved in 10 mM PB pH 7.4, then incubated at 37 °C and shaken at 250 rpm for 6 days.

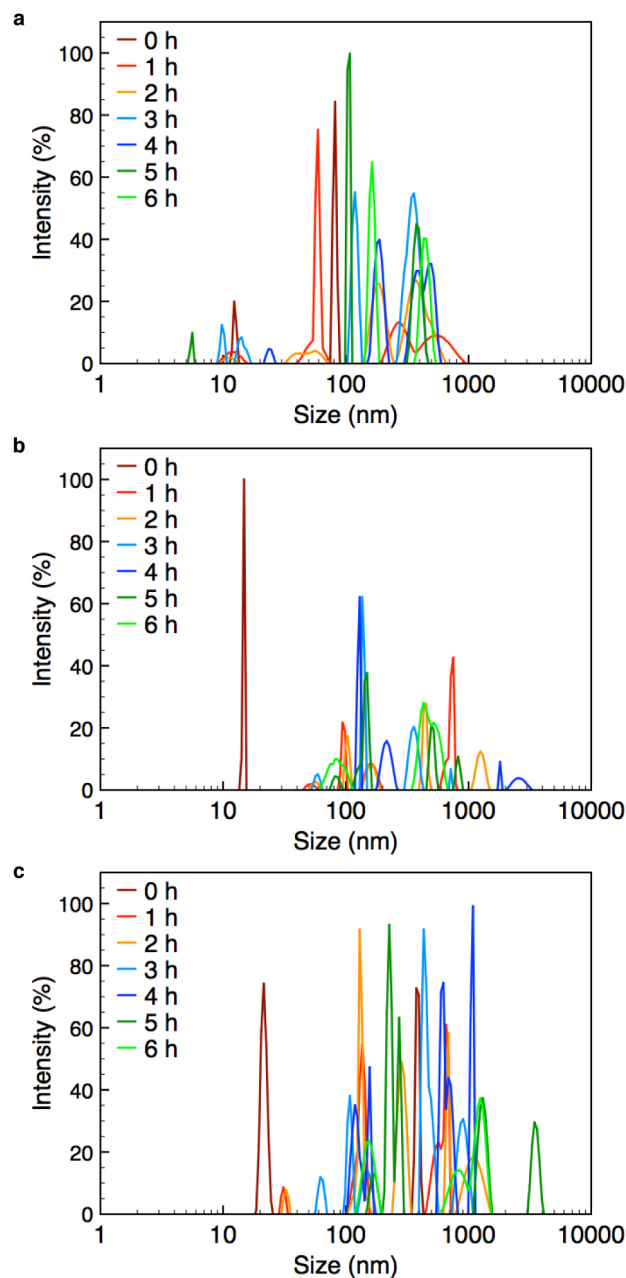

Figure S7: DLS measurements over time. DLS intensity data of a) A $\beta$ 42 (7  $\mu$ M), b) A $\beta$ 42:CB[8]1 :3 (7  $\mu$ M and 22  $\mu$ M, respectively) and c) A $\beta$ 42:CB[8]1:6 (7  $\mu$ M and 45  $\mu$ M, respectively). DLS samples were dissolved in 10 mM PB pH 7.4 and directly measured for time 0 h. The samples were then kept at 37  $^{\circ}$ C and shaken at 200 rpm between each measurement. The data were averaged from at least three independent samples.

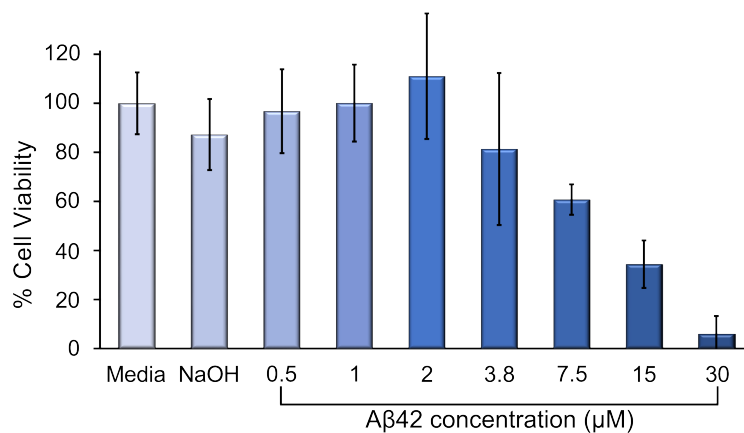

Figure S8: Cell viability data collected on the SH-SY5Y cell line using the MTS assay. Freshly dissolved A $\beta$ 42 was added at different concentrations to the cell media. The cells were incubated for 48 h before the viability assay was performed. The data reported are the mean  $\pm$ SD of at least three independent plates.

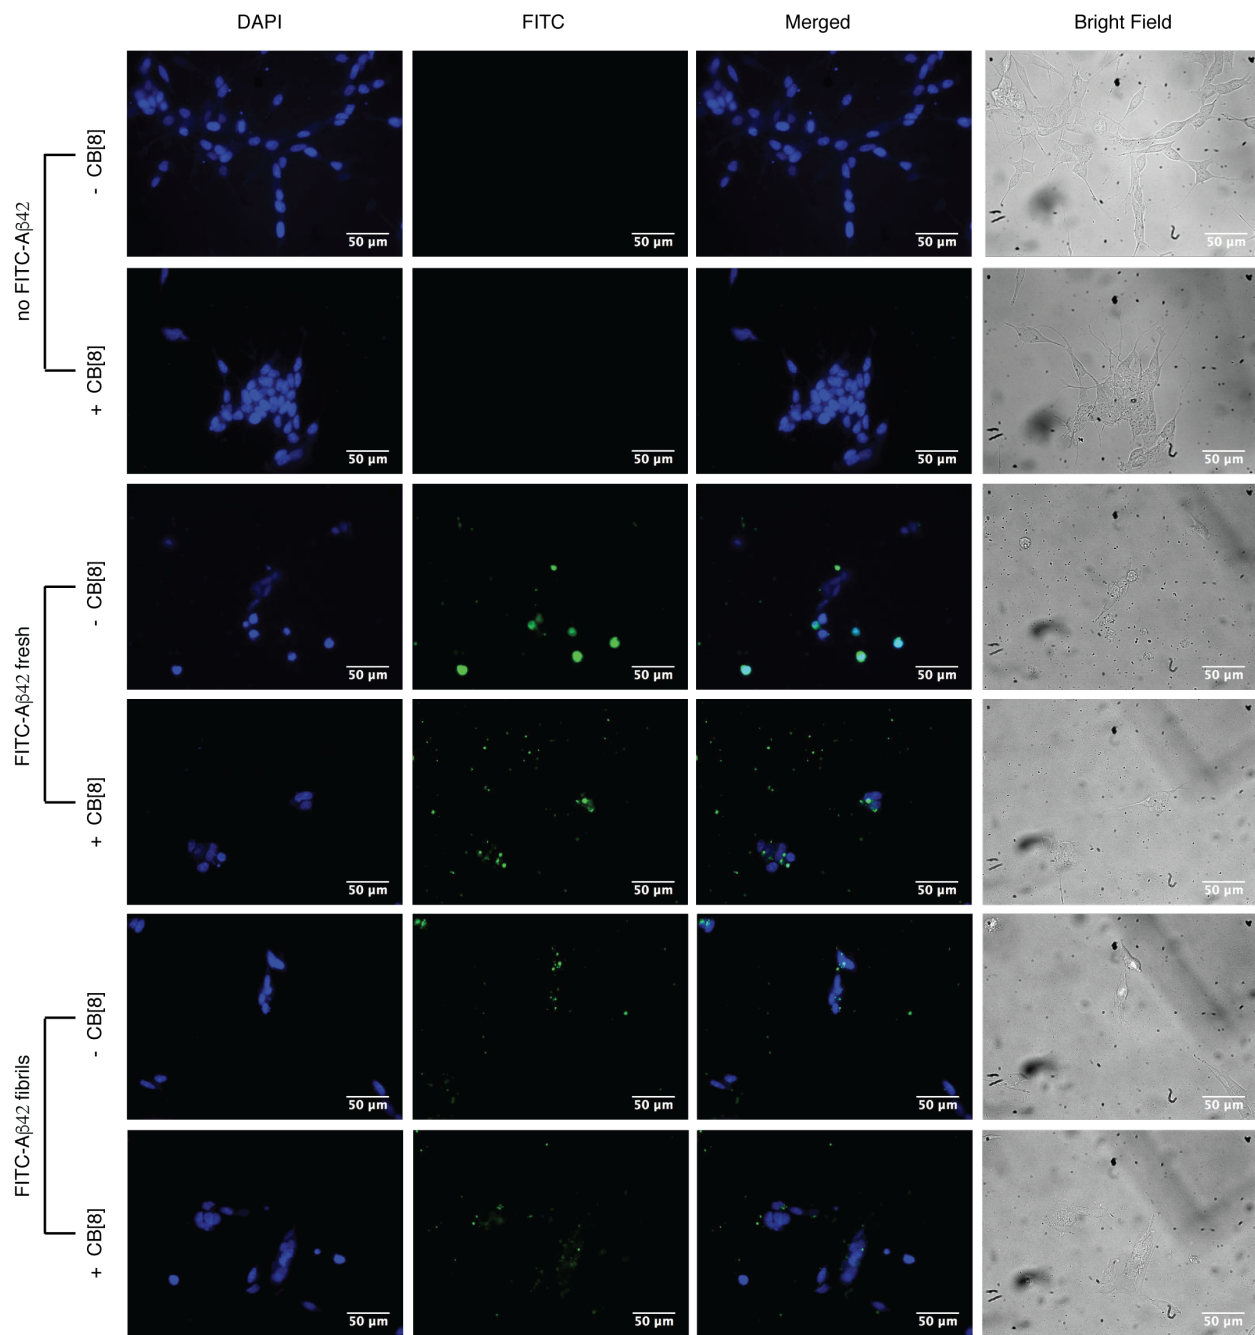

Figure S9: Fluorescence microscope images of SH-SY5Y cells incubated for 48 h in different conditions. From top to bottom: media only, CB[8] only (20  $\mu$ M), FITC-A $\beta$ 42 fresh (10  $\mu$ M) with and without CB[8] (20  $\mu$ M), FITC-A $\beta$ 42 pre-aggregated for 24 h at 37  $^{\circ}$ C and shaken at 250 rpm (10  $\mu$ M) with and without CB[8] (20  $\mu$ M).

## References

- (1) Lee, J. W., Samal, S. Selvapalam, N., Kim, H.-J., Kim, K. (2003) Cucurbituril homologues and derivatives: New opportunities in supramolecular chemistry. *Acc. Chem. Res.* *36*, 621–630.
- (2) Yi, S., Kaifer, A. E. (2011) Determination of the Purity of Cucurbit[n]uril (n = 7, 8) Host Samples *J. Org. Chem.* *76*, 10275–10278.
- (3) Nielsen, L. *et al.* (2011) Effect of Environmental Factors on the Kinetics of Insulin Fibril Formation: Elucidation of the Molecular Mechanism. *Biochemistry* *40*, 6036–6046.
